# Supplementary material for: Simulation of early DNA damage after the irradiation of a fibroblast cell nucleus using Geant4-DNA
Source: PubMed Central journal article supplement (PMC5607336; doi:10.1038/s41598-017-11851-4), 2017-09-20
Supplement: 41598_2017_11851_MOESM1_ESM.pdf [file 41598_2017_11851_MOESM1_ESM.pdf]

# Simulation of early DNA damage after the irradiation of a fibroblast cell nucleus using Geant4-DNA

Sylvain Meylan<sup>1,\*,+,</sup>, Sébastien Incerti<sup>2,3,+,</sup>, Mathieu Karamitros<sup>+,</sup>, Nicolas Tang<sup>1,</sup>, Marta Bueno<sup>1,</sup>, Isabelle Clairand<sup>1,+,</sup>, and Carmen Villagrasa<sup>1,\*\*,+,</sup>

<sup>1</sup>IRSN, Institut de Radioprotection et de Sûreté Nucléaire, BP17, 92962 Fontenay-aux-Roses, France

<sup>2</sup>Univ. Bordeaux, CENBG, UMR 5797, F-33170 Gradignan, France

<sup>3</sup>CNRS, IN2P3, CENBG, UMR 5797, F-33170 Gradignan, France

<sup>+</sup>Member of the Geant4-DNA collaboration

\*sylvain.meylan@symalgo-tech.com

\*\*carmen.villagrasa@irsn.fr

## ABSTRACT

Supplementary material.

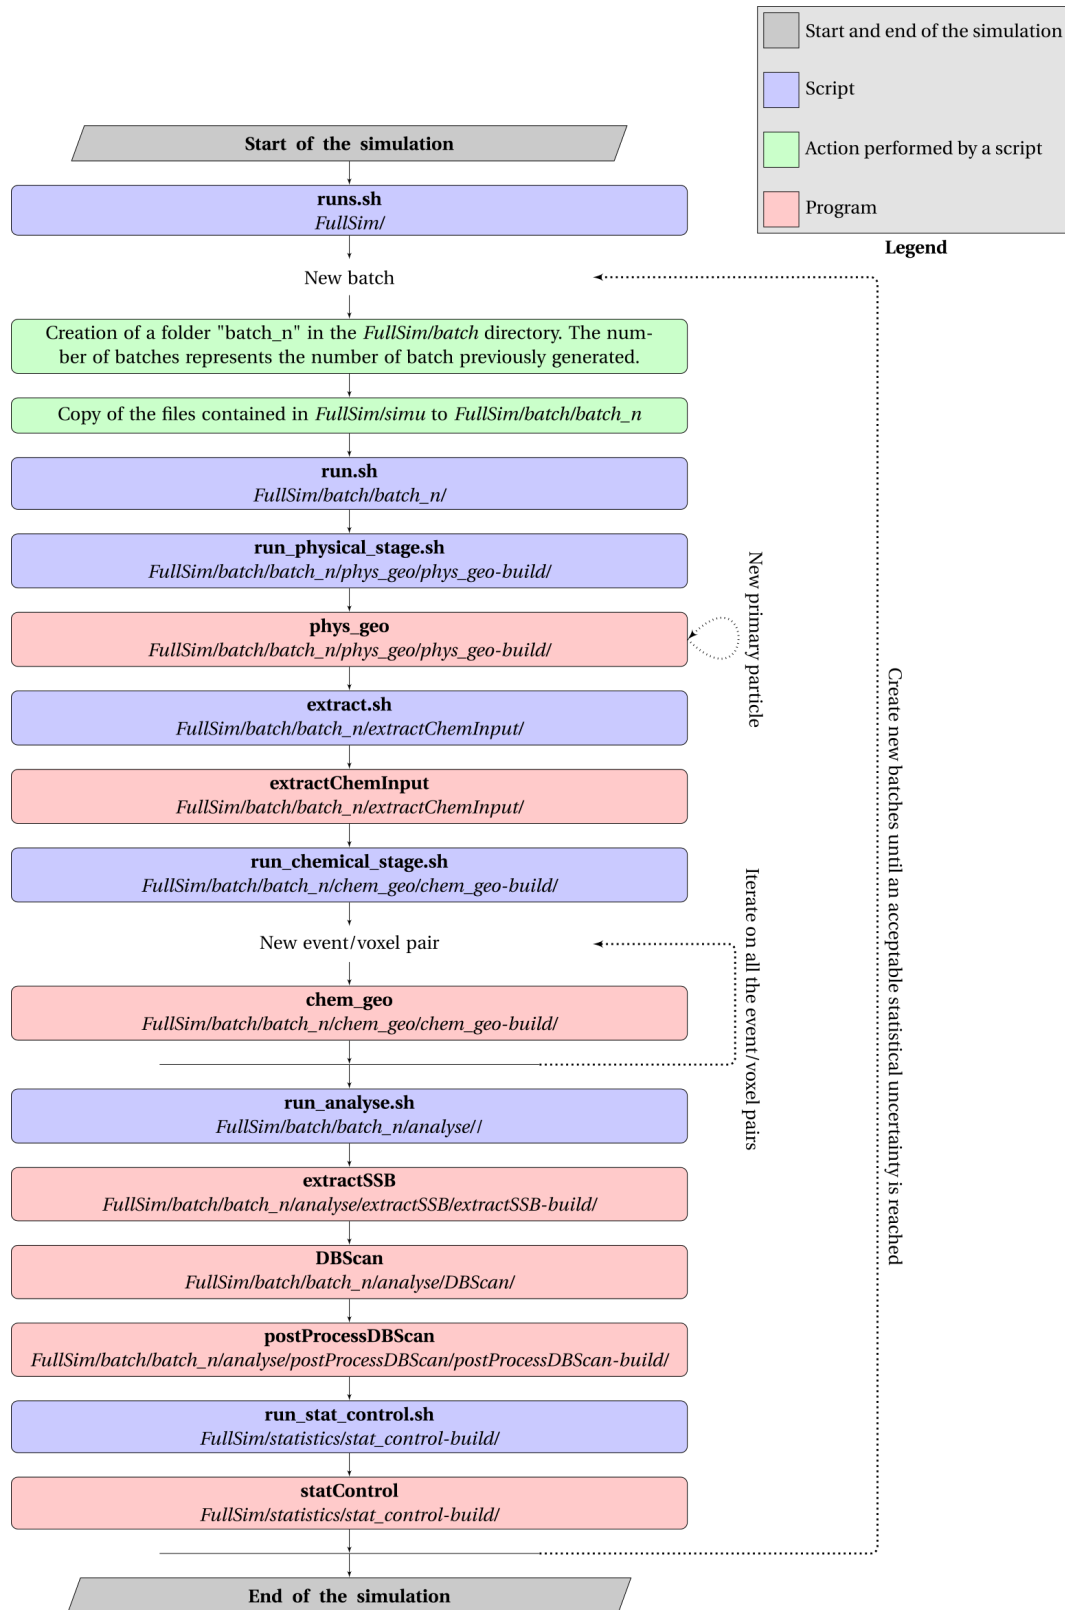

**Figure 1.** Schematic representation of the calculation chain. Its different programs (red) and scripts (blue) are shown in their order of execution.
